# Supplementary material
Source: HighWire-hosted journal article supplement (https://bmjopen.bmj.com/content/12/2/e060266)
Supplement: inline-supplementary-material-1 [file inline-supplementary-material-1.pdf]

**Proposed search strategy**

1. Suicid\*
2. "International student\*" OR "overseas student\*" OR "foreign student\*"
3. Prevent\*
4. Intervention OR interventions
5. "cognitive behavio\* therapy" OR CBT OR psychotherapy OR therap\* OR "behavio\* therapy"
6. Program OR Programs OR Programme OR Programmes
7. Service\*
8. 3 OR 4 OR 5 OR 6 OR 7
9. 1 AND 2
10. 1 AND 2 AND 8
